# Supplementary material for: Prognostic relevance of androgen receptor expression in renal cell carcinomas
Source: PubMed Central journal article supplement (PMC5667981; doi:10.18632/oncotarget.20827), 2017-09-11
Supplement: oncotarget-08-78545-s001.pdf [file oncotarget-08-78545-s001.pdf]

# Prognostic relevance of androgen receptor expression in renal cell carcinomas

## SUPPLEMENTARY MATERIALS

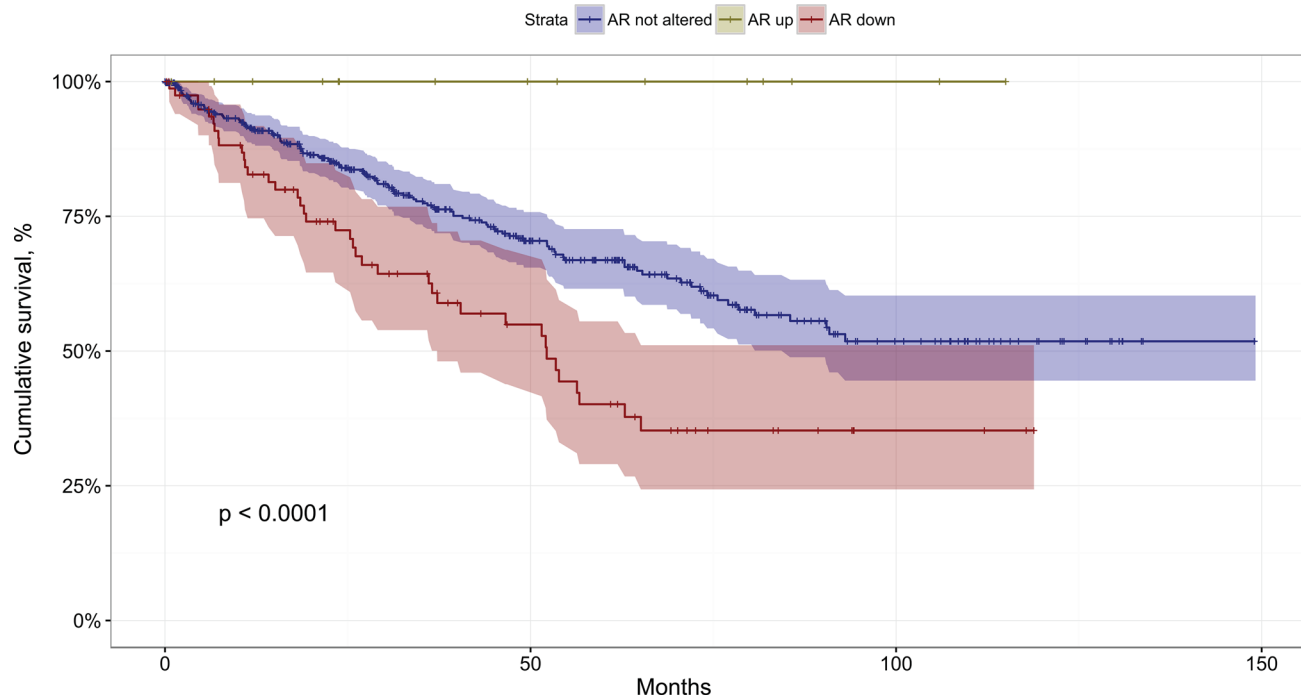

**Supplementary Figure 1: Analysis of a TCGA dataset.** Association between mRNA expression of AR and survival times are represented as Kaplan-Meier-Plots.

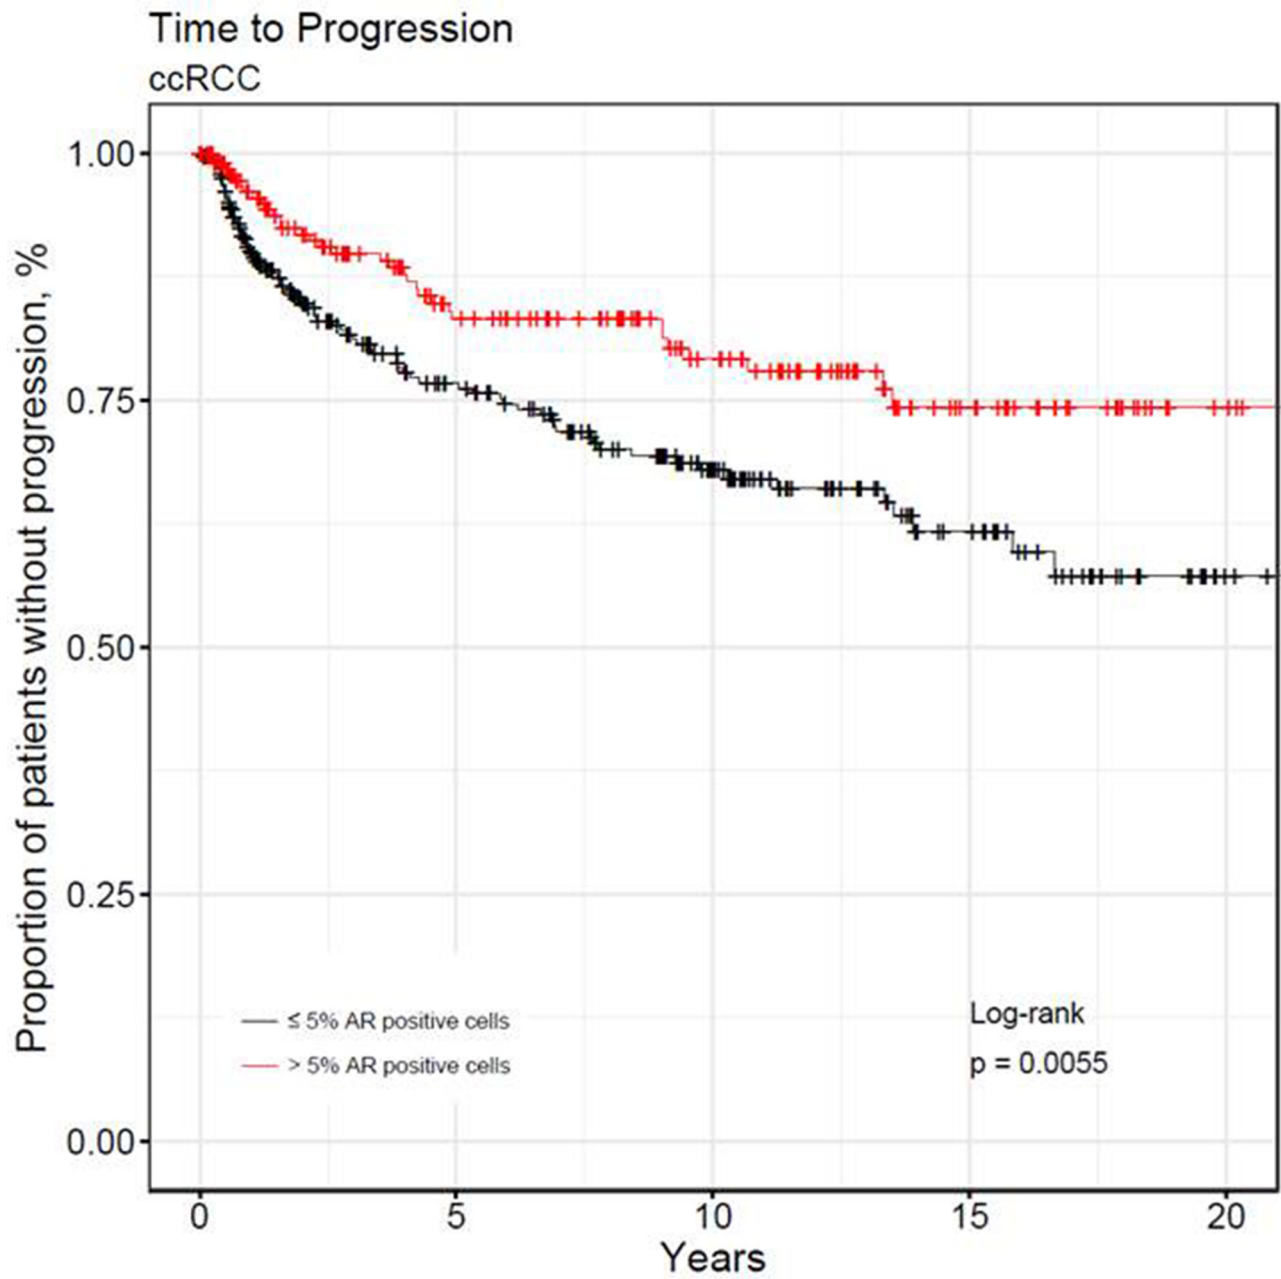

**Supplementary Figure 2: Time to progression and AR expression in clear cell RCC.** Association between time to progression and AR expression represented by Kaplan-Meier-Plots.

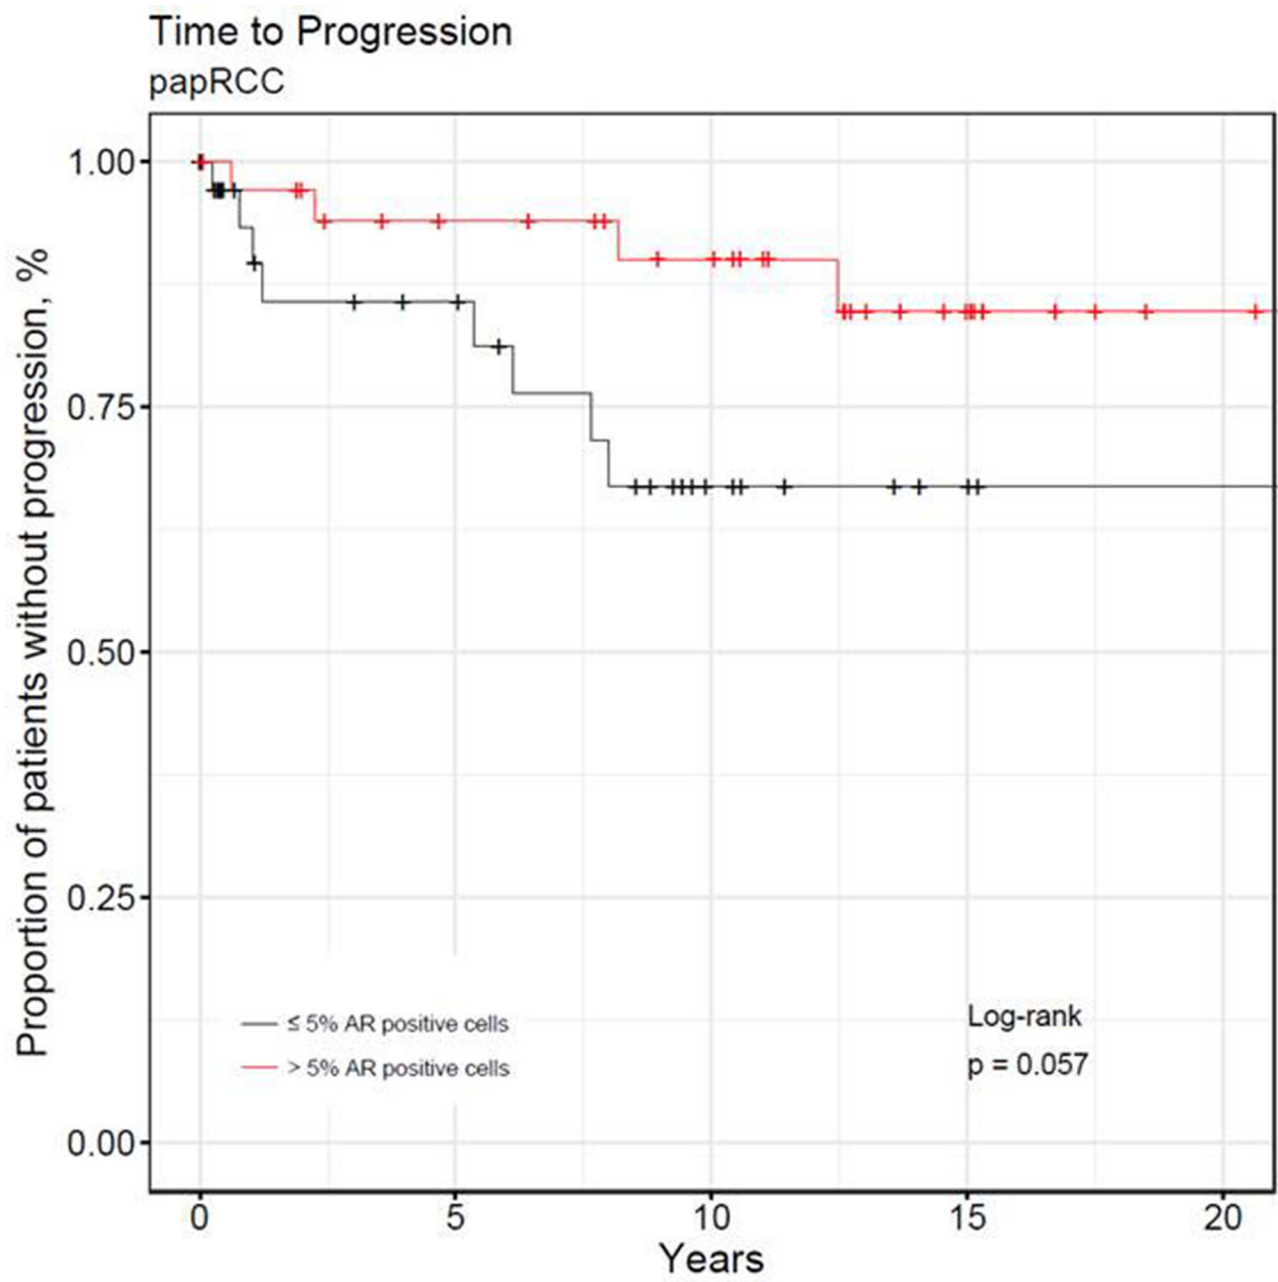

**Supplementary Figure 3: Time to progression and AR expression in papillary RCC.** Association between time to progression and AR expression represented by Kaplan-Meier-Plots.

### Supplementary Table 1: HALO algorithm settings

---

Parameter Name = "Classifier" Value = "Foersch\_AR\_Ery-Elimination"  
Parameter Name = "Class List" Value = "Tissue"  
Parameter Name = "Classify Registered" Value = ""  
Parameter Name = "Nuclear Stain" Value = "0.251,0.184,0.130"  
Parameter Name = "Positive Stain 1" Value = "0.310,0.438,0.587"  
Parameter Name = "Positive Stain 2" Value = "0.0,0.0,0.0"  
Parameter Name = "Stain 1 Localization" Value = "Nucleus"  
Parameter Name = "Stain 2 Localization" Value = "Cytoplasm"  
Parameter Name = "Minimum Tissue OD" Value = "3.7e-002"  
Parameter Name = "Tissue Edge Thickness" Value = "0."  
Parameter Name = "Nuclear Contrast Threshold" Value = "0.466"  
Parameter Name = "Minimum Nuclear OD" Value = "0.123"  
Parameter Name = "Minimum Nuclear Size" Value = "9.8"  
Parameter Name = "Maximum Nuclear Size" Value = "571.7"  
Parameter Name = "Minimum Nuclear Roundness" Value = "0."  
Parameter Name = "Nuclear Segmentation Aggressiveness" Value = "0.88"  
Parameter Name = "Fill Nuclear Holes" Value = "1"  
Parameter Name = "Maximum Cytoplasm Radius" Value = "5."  
Parameter Name = "Stain 1 Min OD Weak" Value = "9.e-002"  
Parameter Name = "Stain 1 Min OD Moderate" Value = "0.19"  
Parameter Name = "Stain 1 Min OD Strong" Value = "0.273"  
Parameter Name = "Stain 2 Min OD Weak" Value = "0.112"  
Parameter Name = "Stain 2 Min OD Moderate" Value = "0.287"  
Parameter Name = "Stain 2 Min OD Strong" Value = "0.445"  
Parameter Name = "Stain 1 Mask" Value = "not set"  
Parameter Name = "Stain 2 Mask" Value = "not set"  
Parameter Name = "Output Image" Value = "Stain 1 Markup"  
Parameter Name = "Verbose Output" Value = "Database"

---

**Supplementary Table 2: Correlation of AR expression in renal clear cell carcinomas with clinicopathological characteristics**

| Variable                     | AR > 5%, n(%) | AR < 5%, n(%) | <i>P</i>       |
|------------------------------|---------------|---------------|----------------|
| <b>Sex</b>                   |               |               | <b>= 0.023</b> |
| Female                       | 61 (33)       | 126 (43)      |                |
| Male                         | 126 (67)      | 164 (57)      |                |
| <b>Age at surgery, years</b> |               |               | <b>= 0.138</b> |
| < 65                         | 118 (63)      | 155 (53)      |                |
| > 65                         | 69 (37)       | 135 (47)      |                |
| <b>ECOG</b>                  |               |               | <b>= 0.077</b> |
| = 0                          | 109 (58)      | 180 (62)      |                |
| > 0                          | 78 (42)       | 110 (38)      |                |
| <b>Tumour extent</b>         |               |               | <b>= 0.001</b> |
| Stage 1/2                    | 136 (73)      | 158 (54)      |                |
| Stage 3/4                    | 51 (27)       | 132 (46)      |                |
| <b>Fuhrman grade</b>         |               |               | <b>= 0.108</b> |
| G1/2                         | 165 (88)      | 235 (81)      |                |
| G3/4                         | 22 (12)       | 55 (19)       |                |
| <b>Distant metastasis</b>    |               |               | <b>= 0.013</b> |
| No                           | 166 (89)      | 231 (80)      |                |
| Yes                          | 21 (11)       | 59 (20)       |                |
| <b>Lymphnode metastasis</b>  |               |               | <b>= 0.077</b> |
| No                           | 180 (96)      | 266 (92)      |                |
| Yes                          | 7 (4)         | 24 (8)        |                |

**Supplementary Table 3: Correlation of AR expression in renal papillary cell carcinomas with clinicopathological characteristics**

| Variable                     | AR > 5%, n(%) | AR < 5%, n(%) | <i>P</i>       |
|------------------------------|---------------|---------------|----------------|
| <b>Sex</b>                   |               |               | = 0.136        |
| Female                       | 7 (21)        | 14 (40)       |                |
| Male                         | 27 (79)       | 21 (60)       |                |
| <b>Age at surgery, years</b> |               |               | = 0.405        |
| < 65                         | 16 (47)       | 25 (71)       |                |
| > 65                         | 18 (53)       | 10 (29)       |                |
| <b>ECOG</b>                  |               |               | = 0.176        |
| = 0                          | 19 (56)       | 24 (69)       |                |
| > 0                          | 15 (44)       | 11 (31)       |                |
| <b>Tumour extent</b>         |               |               | = 0.390        |
| Stage 1/2                    | 29 (85)       | 25 (71)       |                |
| Stage 3/4                    | 5 (15)        | 10 (29)       |                |
| <b>Fuhrman grade</b>         |               |               | = 0.500        |
| G1/2                         | 32 (94)       | 31 (89)       |                |
| G3/4                         | 2 (6)         | 4 (11)        |                |
| <b>Distant metastasis</b>    |               |               | = <b>0.036</b> |
| No                           | 33 (97)       | 27 (77)       |                |
| Yes                          | 1 (3)         | 8 (23)        |                |
| <b>Lymphnode metastasis</b>  |               |               | = 1            |
| No                           | 31 (91)       | 31 (89)       |                |
| Yes                          | 3 (9)         | 4 (11)        |                |
